# Supplementary material for: Early Visual Deprivation Impairs Functional Development of the Visual Ventral Stream
Source: PubMed Central journal article supplement — Invest Ophthalmol Vis Sci. 2023 Aug 1;64(11):1. doi: 10.1167/iovs.64.11.1 (PMC10399603; doi:10.1167/iovs.64.11.1), 2023-08-01
Supplement: iovs-64-11-1_s001.pdf [file iovs-64-11-1_s001.pdf]

Supplementary Table 1. Comparisons of amplitudes and latencies among groups based on ERPs.

| Amplitude / Latency |              | VD children vs. TD children |        |        | TD children vs. Healthy adults |       |       |
|---------------------|--------------|-----------------------------|--------|--------|--------------------------------|-------|-------|
|                     |              | P1                          | N170   | P2     | P1                             | N170  | P2    |
| Character           | Significance | */_                         | _/_    | _/_    | **/**                          | **/** | **/** |
|                     | Peak ROI     | O1                          | O2     | O2     |                                |       |       |
|                     | Peak time    | 105 ms                      | 210 ms | 350 ms |                                |       |       |
| Face                | Significance | */_                         | _/_    | _/_    | **/**                          | **/** | **/** |
|                     | Peak ROI     | O1                          | O2     | O2     |                                |       |       |
|                     | Peak time    | 105 ms                      | 200 ms | 360 ms |                                |       |       |
| Object              | Significance | */_                         | */_    | _/*    | **/**                          | **/** | **/** |
|                     | Peak ROI     | O1                          | O2     | O2     |                                |       |       |
|                     | Peak time    | 115 ms                      | 205 ms | 370 ms |                                |       |       |

Footnotes: The asterisk (\*) and hash (#) both indicate significant differences between two groups; the lack of a significant difference is represented as an underscore (\_). The t-test results of the amplitude and latency of three ERP components are shown according to components and conditions. For the ERP amplitude, asterisks indicate differences of VD < TD and TD > healthy adults, while hashes show differences of TD < healthy adults. For the ERP latency, all asterisks indicate differences of VD > TD and TD > healthy adults.

ERP, event-related potential; VD, visually deprived; TD, typically developing.

\*P<0.05; \*\*P<0.01; \*\*\*P<0.001.

#P<0.05; ##P<0.01; ###P<0.001.

Supplementary Table 2. The highest task-activated regions for three groups.

|                | Character              | Human face             | Object                 |
|----------------|------------------------|------------------------|------------------------|
| VD             | <b>[Ventral]</b>       | <b>[Ventral]</b>       | <b>[Ventral]</b>       |
|                | Fusiform_L             | Lingual_R              | Lingual_L              |
|                | Fusiform_R             | Fusiform_L             | Lingual_R              |
|                | <b>[Dorsal]</b>        | Fusiform_R             | Fusiform_L             |
|                | Temporal_Mid_L         | Temporal_Inf_L         | Fusiform_R             |
|                | <b>[Beyond]</b>        | Temporal_Inf_R         | Temporal_Inf_L         |
|                | Temporal_Pole_Sup_L    | ParaHippocampal_L      | Temporal_Inf_R         |
|                | Frontal_Sup_Orb_L      | <b>[Dorsal]</b>        | ParaHippocampal_L      |
|                | Frontal_Mid_Orb_L      | Temporal_Mid_L         | <b>[Dorsal]</b>        |
|                | Frontal_Inf_Orb_L      | <b>[Beyond]</b>        | Temporal_Mid_L         |
|                | Frontal_Inf_Orb_R      | Frontal_Inf_Orb_L      | <b>[Beyond]</b>        |
|                |                        | Temporal_Pole_Sup_L    | Temporal_Pole_Sup_L    |
| TD             | <b>[Visual cortex]</b> | <b>[Visual cortex]</b> | <b>[Visual cortex]</b> |
|                | Calcarine_L            | Calcarine_L            | Calcarine_L            |
|                | <b>[Ventral]</b>       | <b>[Ventral]</b>       | Occipital_Mid_L        |
|                | Lingual_L              | Lingual_L              | <b>[Ventral]</b>       |
|                | Lingual_R              | Lingual_R              | Lingual_L              |
|                | Fusiform_L             | Fusiform_L             | Lingual_R              |
|                | Fusiform_R             | Fusiform_R             | Fusiform_L             |
|                | Temporal_Inf_L         | Temporal_Inf_L         | Fusiform_R             |
|                | Temporal_Inf_R         | Temporal_Inf_R         | Temporal_Inf_L         |
|                | <b>[Dorsal]</b>        | <b>[Dorsal]</b>        | Temporal_Inf_R         |
|                | Temporal_Mid_L         | Temporal_Mid_L         | <b>[Dorsal]</b>        |
|                |                        | <b>[Beyond]</b>        | Temporal_Mid_L         |
|                |                        | Frontal_Mid_R          |                        |
| Healthy adults | <b>[Ventral]</b>       | <b>[Ventral]</b>       | <b>[Ventral]</b>       |
|                | Lingual_L              | Lingual_L              | Lingual_L              |

---

|                   |                   |                   |
|-------------------|-------------------|-------------------|
| Lingual_R         | Lingual_R         | Lingual_R         |
| Fusiform_L        | Fusiform_L        | Fusiform_L        |
| Fusiform_R        | Fusiform_R        | Fusiform_R        |
| Temporal_Inf_L    | Temporal_Inf_L    | Temporal_Inf_L    |
| Temporal_Inf_R    | Temporal_Inf_R    | Temporal_Inf_R    |
| ParaHippocampal_R | ParaHippocampal_L | ParaHippocampal_R |
| <b>[Dorsal]</b>   | ParaHippocampal_R | <b>[Dorsal]</b>   |
| Precuneus_L       | <b>[Dorsal]</b>   | Precuneus_L       |
| Temporal_Mid_R    | Temporal_Mid_R    | Temporal_Mid_R    |

---

Footnotes: The activated AAL regions are classified according to the visual processing networks.

VD, visually deprived; TD, typically developing; AAL, automated anatomical labeling.

Supplementary Table 3. Between-group comparisons of pre-stimulus alpha PSD at the source level

| Subnetwork                 | Conditions | Frequency | TD_mean | VD_mean | p-value |
|----------------------------|------------|-----------|---------|---------|---------|
| Beyond Network Areas-Left  | Character  | 8 ± 1 Hz  | 4.898   | 10.008  | 0.035   |
| Beyond Network Areas-Left  | Character  | 10 ± 1 Hz | 3.658   | 6.843   | 0.037   |
| Beyond Network Areas-Left  | Character  | 12 ± 1 Hz | 2.961   | 5.486   | 0.034   |
| Beyond Network Areas-Left  | Human face | 8 ± 1 Hz  | 4.775   | 8.607   | 0.025   |
| Beyond Network Areas-Left  | Human face | 10 ± 1 Hz | 3.685   | 6.379   | 0.032   |
| Beyond Network Areas-Left  | Human face | 12 ± 1 Hz | 3.130   | 5.233   | 0.050   |
| Beyond Network Areas-Right | Character  | 8 ± 1 Hz  | 5.335   | 14.197  | 0.030   |
| Beyond Network Areas-Right | Human face | 8 ± 1 Hz  | 4.662   | 9.487   | 0.021   |
| Beyond Network Areas-Right | Human face | 10 ± 1 Hz | 3.683   | 6.468   | 0.045   |
| Beyond Network Areas-Right | Object     | 8 ± 1 Hz  | 4.163   | 9.233   | 0.020   |
| Beyond Network Areas-Right | Object     | 10 ± 1 Hz | 3.306   | 7.423   | 0.016   |
| Beyond Network Areas-Right | Object     | 12 ± 1 Hz | 2.977   | 5.534   | 0.037   |

PSD, power spectrum density; AAL, automated anatomical labeling; VD, visually deprived; TD, typically developing.

Supplementary Table 4. Between-group comparisons of post-stimulus alpha PSD at the source level

| Subnetwork                 | Conditions | Frequency | TD_mean | VD_mean | p-value |
|----------------------------|------------|-----------|---------|---------|---------|
| Beyond Network Areas-Left  | Human face | 12 ± 1 Hz | 3.814   | 8.622   | 0.032   |
| Beyond Network Areas-Right | Object     | 12 ± 1 Hz | 3.397   | 6.417   | 0.047   |
| Visual Cortex-Left         | Object     | 10 ± 1 Hz | 7.760   | 4.617   | 0.046   |
| Visual Cortex-Right        | Object     | 8 ± 1 Hz  | 6.852   | 4.405   | 0.044   |
| Visual Cortex-Right        | Object     | 10 ± 1 Hz | 5.498   | 3.114   | 0.017   |
| Visual Cortex-Right        | Object     | 12 ± 1 Hz | 3.080   | 2.002   | 0.022   |

Footnotes: The activated AAL regions are classified according to conditions.

PSD, power spectrum density; AAL, automated anatomical labeling; VD, visually deprived; TD, typically developing.

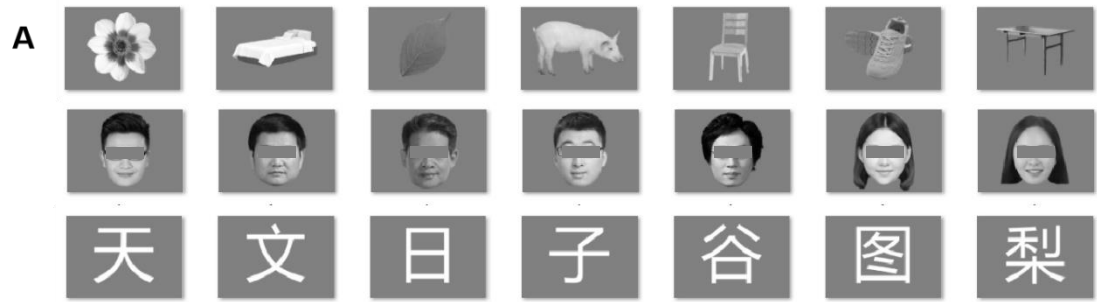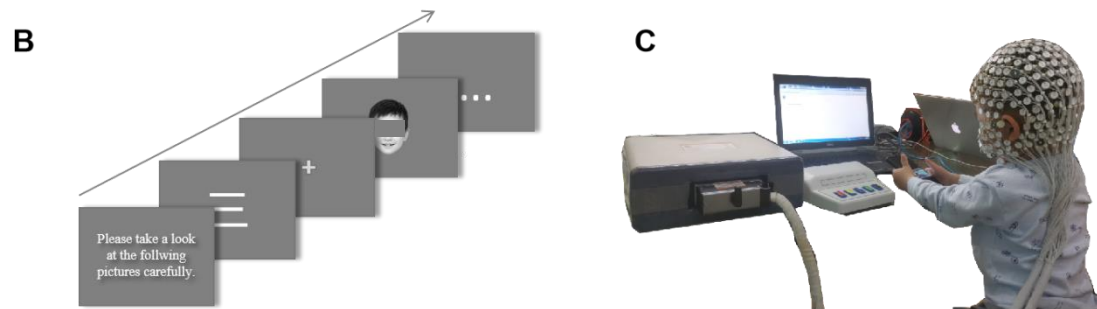

Supplementary Figure 1. Stimuli examples and test procedure.

(A) The stimuli included 90 grayscale pictures of three conditions: (1) objects, (2) human faces, and (3) Chinese characters. The stimuli were framed within an area of 420×300 pixels (14.8 cm×10.6 cm) on a 1920×1080-pixel background of screen size, with gray as the background color. (B) Picture stimuli were randomly presented on the screen for 500 ms. Among each stimulus, there was an interval of 400-600 ms randomly. (C) The children were instructed to stare at the fixation point on the screen.

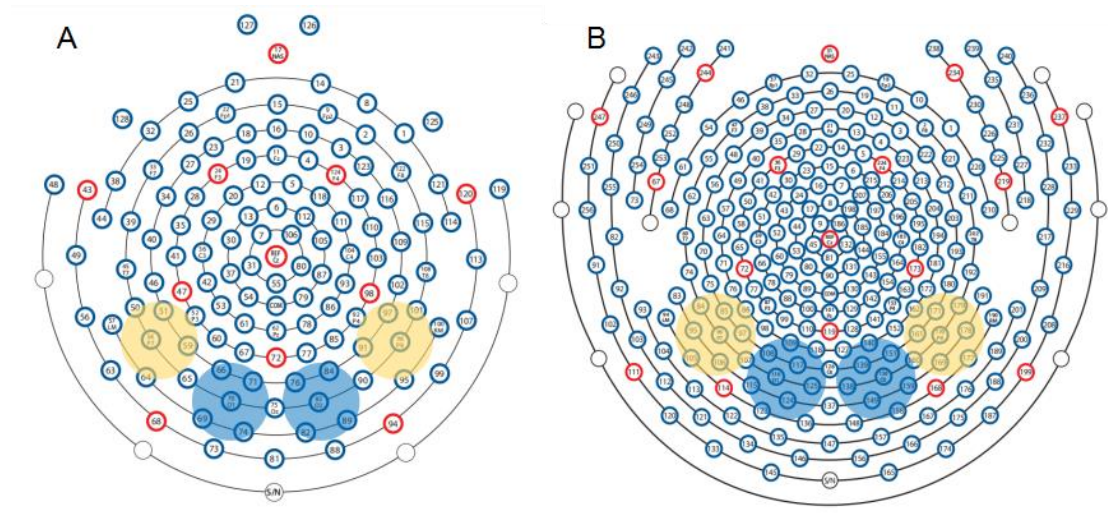

Supplementary Figure 2. Electrode points and corresponding brain regions.

(A) A 128-channel Geodesic Sensor Net. (B) A 256-channel Geodesic Sensor Net. The yellow and blue regions represent four ROIs. The left and right blue regions represent O1 and O2, respectively; the left and right yellow regions represent P7 and P8, respectively.

ROI, region of interest.

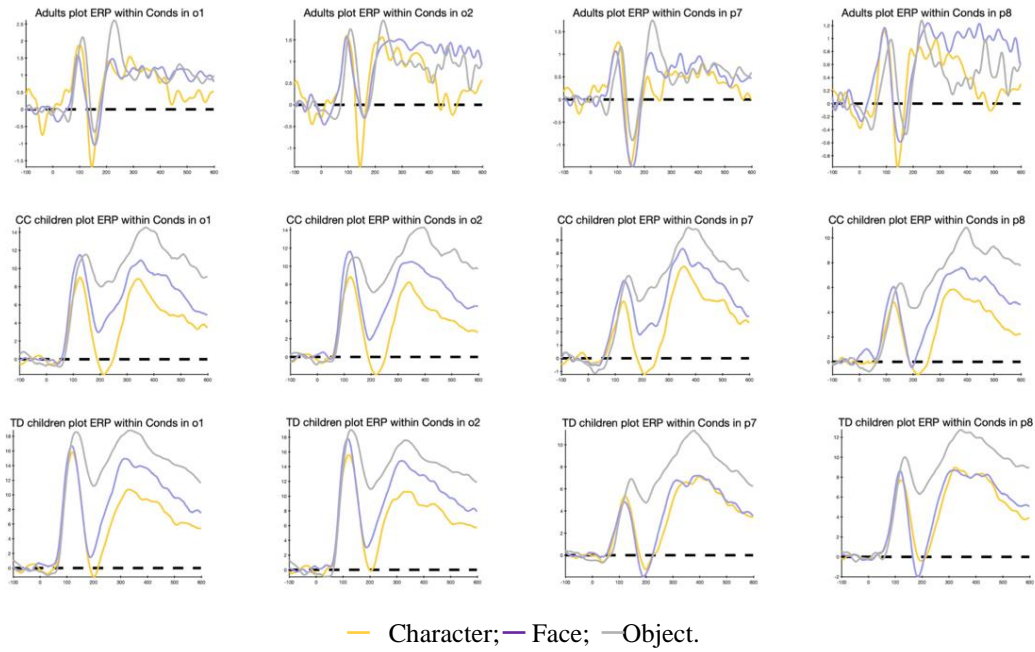

Supplementary Figure 3. Full view of the averaged waveforms for three groups.
